# Supplementary material for: The Interplay between Gut Microbiota and Cognitive Functioning in the Healthy Aging Population: A Systematic Review
Source: MDPI journal article supplement (doi:10.3390/nu16060852), 2024-03-15
Supplement: s1 [file s1]

# Supplementary Material

Table S1. Full search strategies for electronic databases

| Key Concepts     | Concept 1                                                                                | Concept 2                                                                                     | Concept 3                                                                                                                                                                                                                                                                                                                                                 | Concept 4                                                                                                                                                                     |
|------------------|------------------------------------------------------------------------------------------|-----------------------------------------------------------------------------------------------|-----------------------------------------------------------------------------------------------------------------------------------------------------------------------------------------------------------------------------------------------------------------------------------------------------------------------------------------------------------|-------------------------------------------------------------------------------------------------------------------------------------------------------------------------------|
|                  | Healthy human                                                                            | Older adult                                                                                   | Gut microbiota                                                                                                                                                                                                                                                                                                                                            | Cognitive functions                                                                                                                                                           |
| Vocabulary Terms | "human" OR "people"<br>OR "individual" OR<br>"healthy" OR<br>"neurologically<br>healthy" | "older adults OR<br>"aging" OR "older"<br>OR "senior" OR "old"<br>OR "elderly" OR<br>"oldest" | "gut microbiota" OR<br>"gut-microbiome" OR<br>"gut microbiome<br>composition" OR "gut<br>microbiota<br>composition" OR<br>"gut-microbiome" OR<br>"microbiome" OR<br>"microbial diversity"<br>OR "gut microbiome<br>diversity" OR "gut<br>microflora" OR "gut<br>brain axis" OR<br>"dysbiosis" OR "gut<br>bacteria" OR<br>"gastrointestinal<br>microbiota" | "cognitive flexibility"<br>OR "cognitive<br>decline" OR<br>"cognitive" OR<br>"cognitive health" OR<br>"cognition" OR<br>"cognitive function"<br>OR "cognitive<br>performance" |

Each concept will be joined together using AND as a search strategy for all databases.

Table S2. Search terms history

| Electronic<br>Bibliographic<br>Databases | Query                                                                                                                                                                                                                                                                                                                                                                                                                                                                                                                                                                                                                                                                                                                                                                                                                                                                                                                                                                                                                                                                                                                                                                                                                                  | Filters | Results |
|------------------------------------------|----------------------------------------------------------------------------------------------------------------------------------------------------------------------------------------------------------------------------------------------------------------------------------------------------------------------------------------------------------------------------------------------------------------------------------------------------------------------------------------------------------------------------------------------------------------------------------------------------------------------------------------------------------------------------------------------------------------------------------------------------------------------------------------------------------------------------------------------------------------------------------------------------------------------------------------------------------------------------------------------------------------------------------------------------------------------------------------------------------------------------------------------------------------------------------------------------------------------------------------|---------|---------|
| PubMed                                   | ("human"[Title/Abstract] OR "people"[Title/Abstract] OR<br>"individual"[Title/Abstract] OR "healthy"[Title/Abstract] OR<br>"neurologically healthy"[Title/Abstract]) AND ("older adults"[Title/Abstract]<br>OR "aging"[Title/Abstract] OR "older"[Title/Abstract] OR<br>"senior"[Title/Abstract] OR "old"[Title/Abstract] OR<br>"elderly"[Title/Abstract] OR "oldest"[Title/Abstract]) AND ("gut<br>microbiota"[Title/Abstract] OR "gut-microbiome"[Title/Abstract] OR "gut<br>microbiome composition"[Title/Abstract] OR "gut microbiota<br>composition"[Title/Abstract] OR "gut-microbiome"[Title/Abstract] OR<br>"microbiome"[Title/Abstract] OR "microbial diversity"[Title/Abstract] OR<br>"gut microbiome diversity"[Title/Abstract] OR "gut<br>microflora"[Title/Abstract] OR "gut brain axis"[Title/Abstract] OR<br>"dysbiosis"[Title/Abstract] OR "gut bacteria"[Title/Abstract] OR<br>"gastrointestinal microbiota"[Title/Abstract]) AND ("cognitive<br>flexibility"[Title/Abstract] OR "cognitive decline"[Title/Abstract] OR<br>"cognitive"[Title/Abstract] OR "cognitive health"[Title/Abstract] OR<br>"cognition"[Title/Abstract] OR "cognitive function"[Title/Abstract] OR<br>"cognitive performance"[Title/Abstract]) | None    | 171     |
| EBSCO                                    | AB ( ((AB human*) OR (AB people) OR (individual*) OR (healthy) OR<br>(neurologically healthy)) ) AND AB ( ((older adults) OR (aging) OR (old)<br>OR (older) OR (oldest) OR (senior*) OR (elderly)) ) AND AB ( ((gut<br>microbiota*) OR (gut-microbiome) OR (gut microbiome composition) OR<br>(gut microbiota composition) O (microbiome) OR (microbial diversity) OR<br>(Gut microbiome diversity) OR (gut microflora) OR (gut-brain axis) OR<br>(dysbiosis) OR (gastrointestinal microbiota)) ) AND AB ( ((cognitive<br>flexibility) OR (cognitive decline) OR (cognitive) OR (cognitive health) OR<br>(cognition) OR (cognitive function*) OR (cognitive performance)) )                                                                                                                                                                                                                                                                                                                                                                                                                                                                                                                                                            | None    | 139     |
| Web of Science                           | (((((TS=(human*)) OR TS=(people)) OR TS=(individual*)) OR TS=(healthy))<br>OR TS=(neurologically healthy) AND ((((((TS=(older adults)) OR<br>TS=(aging)) OR TS=(OLDEST)) OR TS=(senior*)) OR TS=(OLD)) OR<br>TS=(elderly)) OR TS=(OLDEST) AND ((((((((((TS=(gut microbiota*)) OR<br>TS=(gut microbiome)) OR TS=(gut microbiome composition)) OR TS=(gut<br>microbiota composition)) OR TS=(gut-microbiome)) OR TS=(microbiome))<br>OR TS=(microbial diversity)) OR TS=(gut microbiome diversity)) OR                                                                                                                                                                                                                                                                                                                                                                                                                                                                                                                                                                                                                                                                                                                                   | None    | 423     |

|        |                                                                                                                                                                                                                                                                                                                                                                                                                                                                                                                                                                                                                                                                                                                                                                                                                                                                                                                                                                                                                                                                                                                                                                                                                                                                                                                                                                                                                                                |      |     |
|--------|------------------------------------------------------------------------------------------------------------------------------------------------------------------------------------------------------------------------------------------------------------------------------------------------------------------------------------------------------------------------------------------------------------------------------------------------------------------------------------------------------------------------------------------------------------------------------------------------------------------------------------------------------------------------------------------------------------------------------------------------------------------------------------------------------------------------------------------------------------------------------------------------------------------------------------------------------------------------------------------------------------------------------------------------------------------------------------------------------------------------------------------------------------------------------------------------------------------------------------------------------------------------------------------------------------------------------------------------------------------------------------------------------------------------------------------------|------|-----|
| Scopus | TS=(gut microflora)) OR TS=(gut-brain axis)) OR TS=(dysbiosis)) OR<br>TS=(gut bacteria)) OR TS=(gastrointestinal microbiota) AND<br>((((TS=(cognitive flexibility)) OR TS=(cognitive decline)) OR<br>TS=(cognitive)) OR TS=(cognitive health)) OR TS=(cognition)) OR<br>TS=(cognitive function*)) OR TS=(cognitive performance)                                                                                                                                                                                                                                                                                                                                                                                                                                                                                                                                                                                                                                                                                                                                                                                                                                                                                                                                                                                                                                                                                                                | None | 476 |
|        | (( TITLE-ABS-KEY ( neurologically AND healthy )) OR ( TITLE-ABS-KEY<br>( healthy )) OR ( TITLE-ABS-KEY ( individual* )) OR ( TITLE-ABS-KEY<br>( people )) OR ( TITLE-ABS-KEY ( human* )) ) AND ( ( TITLE-ABS-KEY<br>( older AND adults )) OR ( TITLE-ABS-KEY ( aging )) OR ( TITLE-ABS-<br>KEY ( older )) OR ( TITLE-ABS-KEY ( senior* )) OR ( TITLE-ABS-KEY<br>( old )) OR ( TITLE-ABS-KEY ( elderly )) OR ( TITLE-ABS-KEY ( oldest )) )<br>AND ( ( TITLE-ABS-KEY ( gastrointestinal AND microbiota )) OR ( TITLE-<br>ABS-KEY ( gut AND bacteria )) OR ( TITLE-ABS-KEY ( dysbiosis )) OR<br>( TITLE-ABS-KEY ( gut-brain AND axis )) OR ( TITLE-ABS-KEY ( gut AND<br>microflora )) OR ( TITLE-ABS-KEY ( gut AND microbiome AND<br>diversity )) OR ( TITLE-ABS-KEY ( microbial AND diversity )) OR ( TITLE-<br>ABS-KEY ( microbiome )) OR ( TITLE-ABS-KEY ( gut-microbiome )) OR<br>( TITLE-ABS-KEY ( gut AND microbiota AND composition )) OR ( TITLE-<br>ABS-KEY ( gut AND microbiome AND composition )) OR ( TITLE-ABS-<br>KEY ( gut AND microbiome )) OR ( TITLE-ABS-KEY ( gut AND<br>microbiota* )) ) AND ( ( TITLE-ABS-KEY ( cognitive AND performance ))<br>OR ( TITLE-ABS-KEY ( cognitive AND function* )) OR ( TITLE-ABS-KEY<br>( cognition )) OR ( TITLE-ABS-KEY ( cognitive AND health )) OR ( TITLE-<br>ABS-KEY ( cognitive )) OR ( TITLE-ABS-KEY ( cognitive AND decline ))<br>OR ( TITLE-ABS-KEY ( cognitive AND flexibility )) ) |      |     |

Table S3.1. Risk of bias assessment of the included studies - assessed by MK (Maria Kossowska)

|                   |                                                                          | Citation [Reference]  |                     |                     |                        |                        |                    |
|-------------------|--------------------------------------------------------------------------|-----------------------|---------------------|---------------------|------------------------|------------------------|--------------------|
| Item No           | JBItem                                                                   | Anderson et al., 2017 | Canipe et al., 2021 | Haimov et al., 2022 | Komanduri et al., 2021 | Manderion et al., 2017 | Verdi et al., 2018 |
| 1.                | Were the criteria for inclusion in the sample clearly defined?           | Yes                   | Yes                 | Yes                 | Yes                    | Yes                    | Yes                |
| 2.                | Were the study subjects and the setting described in detail?             | Unclear               | Yes                 | Yes                 | Yes                    | Yes                    | Yes                |
| 3.                | Was the exposure measured in a valid and reliable way?                   | Not Applicable        | Not Applicable      | Not Applicable      | Not Applicable         | Not Applicable         | Not Applicable     |
| 4.                | Were objective, standard criteria used for measurement of the condition? | Yes                   | Yes                 | Yes                 | Yes                    | Yes                    | Unclear            |
| 5.                | Were confounding factors identified?                                     | Yes                   | Yes                 | Yes                 | Yes                    | Yes                    | Yes                |
| 6.                | Were strategies to deal with confounding factors stated?                 | Yes                   | Yes                 | Yes                 | Yes                    | Yes                    | Yes                |
| 7.                | Were the outcomes measured in a valid and reliable way?                  | Yes                   | Yes                 | Yes                 | Yes                    | Yes                    | Yes                |
| 8.                | Was appropriate statistical analysis used?                               | Yes                   | Yes                 | Yes                 | Yes                    | Yes                    | Yes                |
| Score             |                                                                          | 6                     | 7                   | 7                   | 7                      | 7                      | 6                  |
| Overall Appraisal |                                                                          | Include               | Include             | Include             | Include                | Include                | Include            |

Table S3.2. Risk of bias assessment of the included studies - assessed by AB

| Item No                  | JBI Item                                                                 | Citation [Reference]  |                     |                     |                        |                        |                    |
|--------------------------|--------------------------------------------------------------------------|-----------------------|---------------------|---------------------|------------------------|------------------------|--------------------|
|                          |                                                                          | Anderson et al., 2017 | Canipe et al., 2021 | Haimov et al., 2022 | Komanduri et al., 2021 | Manderion et al., 2017 | Verdi et al., 2018 |
| 1.                       | Were the criteria for inclusion in the sample clearly defined?           | Yes                   | Yes                 | Yes                 | Yes                    | Yes                    | Yes                |
| 2.                       | Were the study subjects and the setting described in detail?             | Unclear               | Yes                 | Yes                 | Yes                    | Yes                    | Yes                |
| 3.                       | Was the exposure measured in a valid and reliable way?                   | Not Applicable        | Not Applicable      | Not Applicable      | Not Applicable         | Not Applicable         | Not Applicable     |
| 4.                       | Were objective, standard criteria used for measurement of the condition? | Yes                   | Yes                 | Yes                 | Yes                    | Yes                    | Unclear            |
| 5.                       | Were confounding factors identified?                                     | Yes                   | Yes                 | Yes                 | Yes                    | Yes                    | Yes                |
| 6.                       | Were strategies to deal with confounding factors stated?                 | Yes                   | Yes                 | Yes                 | Yes                    | Yes                    | Yes                |
| 7.                       | Were the outcomes measured in a valid and reliable way?                  | Yes                   | Yes                 | Yes                 | Yes                    | Yes                    | Yes                |
| 8.                       | Was appropriate statistical analysis used?                               | Yes                   | Yes                 | Yes                 | Yes                    | Yes                    | Yes                |
| <b>Score</b>             |                                                                          | 6                     | 7                   | 7                   | 7                      | 7                      | 6                  |
| <b>Overall Appraisal</b> |                                                                          | Include               | Include             | Include             | Include                | Include                | Include            |

Table S3.3. Risk of bias assessment of the included studies - assessed by MK (Marcelina Karbowski)

| Item No                  | JBI Item                                                                 | Citation [Reference]  |                     |                     |                        |                        |                    |
|--------------------------|--------------------------------------------------------------------------|-----------------------|---------------------|---------------------|------------------------|------------------------|--------------------|
|                          |                                                                          | Anderson et al., 2017 | Canipe et al., 2021 | Haimov et al., 2022 | Komanduri et al., 2021 | Manderion et al., 2017 | Verdi et al., 2018 |
| 1.                       | Were the criteria for inclusion in the sample clearly defined?           | Yes                   | Yes                 | Yes                 | Yes                    | Yes                    | Unclear            |
| 2.                       | Were the study subjects and the setting described in detail?             | Unclear               | Yes                 | Unclear             | Unclear                | Yes                    | Unclear            |
| 3.                       | Was the exposure measured in a valid and reliable way?                   | Not Applicable        | Not Applicable      | Not Applicable      | Not Applicable         | Not Applicable         | Not Applicable     |
| 4.                       | Were objective, standard criteria used for measurement of the condition? | Yes                   | Yes                 | Yes                 | Yes                    | Yes                    | Yes                |
| 5.                       | Were confounding factors identified?                                     | Yes                   | Unclear             | Unclear             | Unclear                | Unclear                | Yes                |
| 6.                       | Were strategies to deal with confounding factors stated?                 | Yes                   | Yes                 | Yes                 | Yes                    | Yes                    | Yes                |
| 7.                       | Were the outcomes measured in a valid and reliable way?                  | Yes                   | Unclear             | Unclear             | Unclear                | Unclear                | Unclear            |
| 8.                       | Was appropriate statistical analysis used?                               | Yes                   | Yes                 | Yes                 | Yes                    | Yes                    | Yes                |
| <b>Score</b>             |                                                                          | 5                     | 6                   | 7                   | 6                      | 6                      | 5                  |
| <b>Overall Appraisal</b> |                                                                          | Include               | Include             | Include             | Include                | Include                | Include            |
